RESEARCH ARTICLE

# Impacts of patient advisory councils on recovery for sepsis survivors: a case study

Mia Sheehan<sup>1,2\*</sup>, Stefanie K. Novakowski<sup>1,2</sup>, Fatima Sheikh<sup>3</sup>, Susan Korstad<sup>4</sup>, Kristin MacDonald<sup>4,5</sup>, Jordan Sacks<sup>5</sup>, Kristine Russell<sup>4,5</sup>, Marie-Maxime Bergeron<sup>4,5</sup>, Marianne Vidler<sup>6</sup>, on behalf of Sepsis Canada<sup>†</sup>

**1** Institute for Global Health, BC Children's Hospital and BC Women's Hospital & Health Centre, Vancouver, Canada, **2** Department of Anesthesiology, Pharmacology & Therapeutics, University of British Columbia, Vancouver, Canada, **3** Department of Health Research Methods, Evidence, and Impact, McMaster University, Hamilton, Canada, **4** University of British Columbia Action on Sepsis Research Excellence Cluster Patient Advisory Council, Vancouver, Canada, **5** Sepsis Canada Patient Advisory Council, Hamilton, Canada, **6** Department of Obstetrics and Gynecology, University of British Columbia, Vancouver, Canada

<sup>†</sup> Membership of the Sepsis Canada research network can be found online at <https://www.sepsiscanada.ca/>.

☞ These authors contributed equally to this work.

\* [mia.sheehan@bcchr.ca](mailto:mia.sheehan@bcchr.ca)

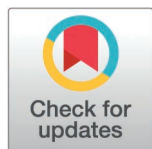

## OPEN ACCESS

**Citation:** Sheehan M, Novakowski SK, Sheikh F, Korstad S, MacDonald K, Sacks J, et al. (2025) Impacts of patient advisory councils on recovery for sepsis survivors: a case study. PLoS One 20(10): e0334057. <https://doi.org/10.1371/journal.pone.0334057>

**Editor:** Vincenzo Lionetti, Scuola Superiore Sant'Anna, ITALY

**Received:** February 28, 2025

**Accepted:** September 22, 2025

**Published:** October 9, 2025

**Copyright:** © 2025 Sheehan et al. This is an open access article distributed under the terms of the [Creative Commons Attribution License](https://creativecommons.org/licenses/by/4.0/), which permits unrestricted use, distribution, and reproduction in any medium, provided the original author and source are credited.

**Data availability statement:** Data cannot be shared publicly due to ethical restrictions, as participants did not provide consent at the time of data collection for data to be shared publicly. An anonymized minimal dataset will be available by request for researchers who meet the criteria for access to confidential

## Abstract

### Introduction

Sepsis is a life-threatening condition with significant long-term impacts for survivors and their families. The known benefits of patient engagement have led to increased efforts globally to involve survivors in sepsis research. This study aimed to characterize the experiences of sepsis survivors and their families in patient advisory councils (PACs) for two Canadian sepsis research networks (Action on Sepsis and Sepsis Canada) and explore how PAC involvement supports long-term recovery.

### Methods

This mixed-methods cross-sectional study consisted of a structured survey, ten interviews, and one focus group discussion. All current members of the Sepsis Canada and Action on Sepsis PACs (n=29) were invited to participate. The results of the survey were analyzed descriptively and used to inform the development of the semi-structured interview guide. Qualitative data were analyzed using a thematic approach.

### Results

Overall, 16 PAC members participated. The majority of participants were women and over 40 years old. Survey scores showed that most participants felt meaningfully engaged, while the qualitative findings highlighted how PACs supported recovery and fostered community connections between survivors, families, and researchers.

data and approval by the Principal Investigator (contact via [Marianne.Vidler@cw.bc.ca](mailto:Marianne.Vidler@cw.bc.ca)) and the University of British Columbia Research Ethics Board (contact via [cwreb@bcchr.ubc.ca](mailto:cwreb@bcchr.ubc.ca)).

**Funding:** This project was support by a Sepsis Canada Patient Partners' Research in Sepsis (PPRS): Small Research Grant (awarded to MV, KR, MMB, KM, SN, and FS; <https://www.sepsiscanada.ca/funding/investigator-awards>). The funder had no role in study design, data collection and analysis, decision to publish, or preparation of the manuscript.

**Competing interests:** The authors have declared that no competing interests exist.

Major themes included sepsis experience, recovery journey, characteristics of PACs, characteristics of PAC participation, and impacts of PAC involvement.

## Conclusion

Our findings demonstrate that PACs provide critical benefits that extend beyond feeling valued or appreciated for contributing to a specific project. These findings highlight the value of patient-oriented research in shaping evidence-based practices and policies and emphasize the need for trauma-informed approaches and improved post-sepsis care pathways to enhance recovery outcomes.

## Introduction

Sepsis is life-threatening organ dysfunction caused by a dysregulated host response to infection [1,2]. In 2017, there were an estimated 48.9 million cases of sepsis and 11 million sepsis deaths globally [3]. In Canada, a retrospective review of administrative data from Ontario found that 1 in 20 hospitalizations included sepsis, and health-care costs for patients with sepsis were \$672 million more compared to their matched controls [4]. Patients who survive sepsis can experience long-term emotional, physical, neurocognitive, and economic impacts [5], including heightened risk of rehospitalization [6], increased use of high-cost healthcare [7], and increased risk of death [8,9]. Caregivers and family members of individuals hospitalized for critical illnesses such as sepsis also experience ongoing psychological and emotional distress, including post-traumatic stress disorder [10]. Given the significant impacts of sepsis on survivors and their families, there have been increased efforts to better incorporate patient and family voices in sepsis research.

Over the past decade, patient engagement has become a critical approach to enhance the relevance, quality, and impact of healthcare and research [11]. The inclusion of lived experience allows for improved research and clinical care by ensuring that research questions, outcomes, and sharing of the results align with patient and community needs and priorities [12]. This engagement can further contribute to patient empowerment, leading to transformative experiences for patient partners [13,14]. Partnering with survivors and their families also enhances patient voices and contributes to patient-oriented research that informs policy [15] and health system change [16]. Given the well-documented benefits of engaging with patients and caregivers to improve research and healthcare delivery [17], sepsis organizations globally (e.g., Health Quality BC, Canadian Sepsis Foundation, Global Sepsis Alliance, UK Sepsis Trust) have engaged with patients to raise awareness of sepsis and improve advocacy and clinical care through patient involvement. In the last five years, two Canadian sepsis research networks (University of British Columbia (UBC)'s Action on Sepsis Research Excellence Cluster and Sepsis Canada) established patient advisory councils (PACs) to guide strategic decision-making and facilitate patient-oriented research. However, there is limited literature characterizing research network engagement within the context of patients' long-term recovery from sepsis, or

other critical illnesses (e.g., post-ICU syndrome, long-COVID) [18]. This study aimed to address this gap by exploring the experiences of sepsis survivors and their families participating in PACs and characterizing the impact of this engagement on their long-term recovery.

## Materials and methods

### Study design

This mixed-methods cross-sectional study was initiated and led by two members of the Sepsis Canada and Action on Sepsis PACs and a UBC Assistant Professor. The UBC's Action on Sepsis PAC was established in May 2020 and consisted of 5 patient partners from three provinces. The Action on Sepsis PAC supports a provincial sepsis research network where most members are UBC faculty. The Sepsis Canada PAC was established in January 2022 and consisted of 28 patient partners across 8 provinces, including individuals who are also members of the Action on Sepsis PAC. The Sepsis Canada PAC supports a national sepsis research network with members from 8 Canadian provinces and 11 additional countries. In this study, the terms patient partners and PAC members are used interchangeably. As PAC members, these patient partners participate in a range of activities including network operations (e.g., strategic planning, attending steering committee or PAC meetings), research (e.g., reviewing grant proposals or manuscripts, co-developing studies), and knowledge translation (e.g., presentations, public awareness campaigns, or developing patient education materials). PAC members were able to choose the extent of their engagement in each activity based on their interests, availability, and readiness. We referred to the Consensus-Based Checklist for Reporting of Survey Studies [19], Consolidated Criteria for Reporting Qualitative Research [20], and Guidance for Reporting Involvement of Patients and the Public (GRIPP2) [21] for reporting the study (S1–S3 Appendix).

### Study team

The study team consisted of 5 patient partners (MMB, KR, KM, SK, JS), a UBC Assistant Professor with experience in qualitative methodology and patient-oriented research (MV), the Action on Sepsis Network Coordinator (SN; PhD-prepared UBC employee), a PhD candidate and health equity specialist with experience conducting sepsis-related research in Canada (FS; trainee with Sepsis Canada), and a research assistant with Action on Sepsis (MS; recent MPH graduate who received training in conducting qualitative interviews and applying a trauma-informed lens to understanding patient experiences by MV).

### Participant recruitment

All current members of the Sepsis Canada or Action on Sepsis PACs were eligible to participate (n=29). Members were either sepsis survivors or caregivers of sepsis survivors. Recruitment for the survey and interviews/focus group discussions were conducted separately, using targeted recruitment through the PACs membership email lists. Participants did not have to complete the survey to be eligible to participate in interviews. Study invitation emails contained a short description of the study, contact information, and a link to the survey or contact information for MS, who facilitated interviews and focus group discussions. These invitations were distributed by the Sepsis Canada or Action on Sepsis Network Coordinators after review and approval by the respective PAC Co-Chairs, who are sepsis survivors themselves. After two weeks, a second email reminding members about the study was also distributed.

### Survey – Recruitment, data collection, and data analysis

We recruited participants for the survey from February 16 to March 21, 2024, until the target sample size was reached (n=15). The sample size assumed a 50% response rate among the 29 potential participants. The survey link remained active for one month after the recruitment period. After completing the survey, participants were automatically re-directed

to a new Research Electronic Data Capture (REDCap) survey where they were invited to provide their name (optional) and email to receive a near cash equivalent (gift card) of \$10 in recognition of their contribution. This enabled identifiers (name and email) to be stored separately from survey responses to ensure confidentiality of responses.

The survey was administered using REDCap and participants provided consent electronically. The survey ([S4 Appendix](#)) used the validated Patient Engagement in Research Scale (PEIRS) [21] based on relevance and appropriateness of the survey items to the study objectives. Prior to beginning data collection, additional questions on patient demographics and length and level of engagement with PACs were developed and iteratively revised following discussions among the study team. We pilot tested the survey for clarity and appropriateness with two PAC members. No significant changes were made to survey questions after pilot testing and responses from these two patient partners were included in the final analysis. No actions were taken to prevent multiple participation, as we determined this was unlikely given our targeted approach to recruitment.

Given the small sample size of the survey, the risk of re-identification is high and thus only aggregate data about patient demographics and engagement with PACs are reported. PEIRS scores were calculated following the published method [21]. Each item on the PEIRS was assigned a numeric value between 0 and 4 (strongly disagree to strongly agree, respectively). Scores for each domain were calculated as:  $((\text{sum of responses})/(\text{total number of items responded to within that domain} \times 4) \times 100)$ . If participants responded as 'Not Applicable', no numerical value was assigned to that item and the denominator was modified accordingly. In the validated PEIRS (21), a total score below 70.1 is considered a 'deficient' degree of meaningful engagement; between 70.1 and 82.7 is a 'moderate' degree; between 82.7 and 92.0 is 'very high' degree; and above 92.0 is an 'extremely high' degree. The semi-structured interview guide ([S5 Appendix](#)) was developed to further explore items where participants reported 'deficient' degree of meaningful engagement and items where there was high discordance across individual responses (i.e., participants' responses ranged from 'moderate' to 'extremely high').

### Interviews and focus groups – Recruitment, data collection, and data analysis

We recruited participants and conducted qualitative interviews and focus group discussions between May 16 and August 12, 2024, until data saturation was reached. PAC members who indicated their interest in participating in the interview were first contacted by a female research assistant (MS; MPH-prepared) to schedule an initial review of the consent form, including the study objectives, overview of interview, and preference for focus group discussion or interview. MS had no relationship with the PACs or sepsis research networks prior to this contact. During the initial review, MS introduced herself and her role in the study. Participants were provided with the option of either participating in interviews or focus group discussions as we recognized that some participants would receive emotional support from discussing these issues with peers who have similar experiences, while others prefer one-on-one interviews. Participants were given one week to review the consent form and make any inquiries to the study team before providing an electronic copy of their signed informed consent to MS. MS then scheduled either an interview or focus group discussion with the participant. The focus group discussion was scheduled once an appropriate group size ( $n=6$ ) was reached. Participants were offered \$25 per hour (in the form of a gift card) for their time participating in the in-depth interview or focus group discussion. These individuals were also reimbursed for additional costs (i.e., childcare) incurred as a result of participating in this study if discussed with MS before the interview took place. Participants were informed that they would still receive compensation even if they needed to end the interview early.

A semi-structured interview guide was developed by the study team (SN, MV, MMB, KR, FS), as described above. The interview guide was pilot tested with a patient partner who was not involved in creating the interview guide. No significant changes were made to the interview guide and the response from the patient partner was included in the final analysis. Interview topics included: sepsis experience, recovery journey, impact of PAC engagement, and experience with PACs. A trauma-informed lens was used to minimize potential triggering of emotional stress related to sepsis experiences while enabling open-ended exploration of the experiences of sepsis survivors and their families. Prior to beginning the

interviews, all participants were provided with a list of appropriate, available, and affordable mental health services and reminded they could stop the interview at any time.

The interviews were 30–60 minutes, and the focus group discussion was 90 minutes. All interviews and focus group discussions were conducted virtually by MS from a private location within the research team's office and audio and video recorded on Zoom. Participants were free to join from a location of their choice. No repeat interviews were conducted. MV attended the focus group discussion and first interview conducted to provide supervisory support for MS. MV had previously met two participants (virtually), as these individuals were also members of the study team, but otherwise had no prior relationship with the participants. MS, MV, and SN met after every interview to discuss field notes and progress to data saturation. One participant dropped out after consenting to a focus group discussion due to scheduling conflict, one participant initially scheduled for a focus group discussion completed an interview, and no interviews ended early. No interview transcripts were returned to participants. A summary of results was prepared and distributed to participants after data analysis was complete.

Interviews and the focus group discussion were transcribed verbatim and analyzed thematically [22] using NVivo 14 (QSR International, Melbourne, Australia). Our analysis was informed by a phenomenology approach, which focused on understanding the meanings participants attributed to their lived experiences and allowing themes to emerge from the data [23–25]. The transcripts of three interviews were reviewed by the research team (MS, MV, and SN) who identified key themes and developed an initial coding framework. These researchers consistently discussed the frames and their interpretation of the qualitative data with a patient partner (MMB) until all coding frames were agreed. Coding was done manually by MS and MV. All coded transcripts were de-identified to protect the confidentiality of study participants and were reviewed by MMB, JS, and FS. The research team met regularly to resolve any discrepancies and to ensure consensus was reached.

## Ethics statement

All participants provided written informed consent. Transcripts and survey responses were de-identified and stored in a secure and password-protected location that can only be accessed by members of the study team. Ethics approval was obtained from the UBC/Children's and Women's Health Centre of British Columbia Research Ethics Board (H23-03622).

## Results

Overall, 16 individuals participated in the study (Figs 1 and 2). Most respondents were women, over 40 years old, and were sepsis survivors. Participants were from six provinces across Canada (ON, AB, BC, MB, SK, QC). Thirteen participants were only part of the Sepsis Canada PAC, 1 participant was only part of the Action on Sepsis PAC, and 2 participants were part of both PACs.

Among the 13 participants who completed the survey, three participants reported an 'extremely high' degree of meaningful engagement, two reported a 'very high' degree, seven reported a 'moderate' degree, and one participant reported a 'deficient' degree of meaningful engagement (Table 1). Across individual domains and participants, we observed scores consistent with a 'deficient' degree of meaningful engagement in convenience, team environment and interaction, support, and benefits. We focused the interview questions on these topics.

Information shared by PAC members was characterized into five major themes: sepsis experience, recovery journey, PAC characteristics, characteristics of PAC participation, and impacts of PAC involvement. Sub-themes, key findings, and illustrative quotes are available in Tables 2–6.

## Sepsis experience

Regardless of the cause, participants' sepsis experiences were sudden, severe, and life-altering (Table 2). Many participants faced misdiagnosis and late detection. Others experienced sepsis as an unexpected complication following surgery. Both survivors and their families frequently expressed receiving poor communication from healthcare providers regarding sepsis diagnosis and post-discharge care.



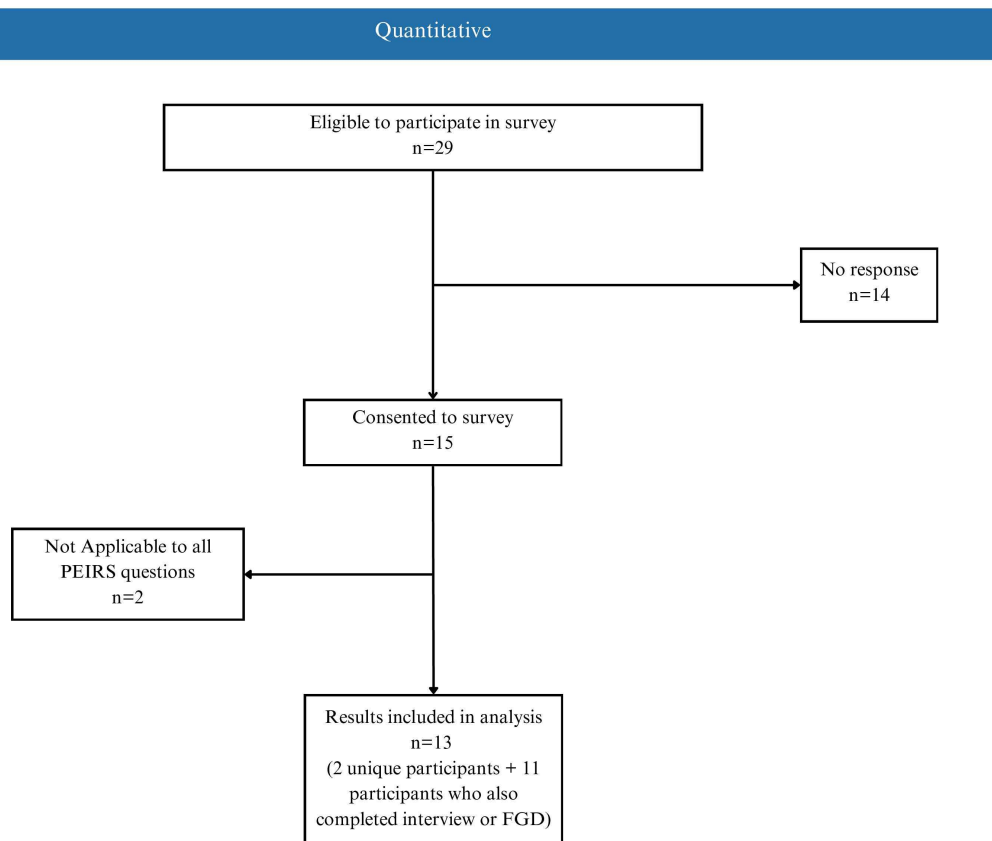

**Fig 1. Participant flow chart for quantitative methods.** A total of 13 PAC members participated in the survey. PEIRS = Patient Engagement in Research Scale; FGD = Focus group discussions.

<https://doi.org/10.1371/journal.pone.0334057.g001>

## Recovery journey

Most participants had no expectations for recovery, due to the lack of information shared at discharge about the mental, physical, and cognitive impacts of sepsis that they would experience. Some survivors were never told that they had sepsis, contributing to their lack of expectations. Participants described many physical impacts (Table 3) that affected their ability to complete everyday activities. All participants faced significant mental health challenges following sepsis, and some reported post-traumatic stress disorder and suicidality. Survivors often felt isolated and alone in their care and recovery. Many survivors sought psychiatric care for mental health support, often on their own, as this support was not integrated into their sepsis care. Cognitive challenges were described as a common result of sepsis by the participants. These difficulties, including memory loss, impacted their daily functioning and ability to return to work or engage in certain PAC activities. Caregivers and other family members struggled witnessing their loved ones experience sepsis and navigating decision-making, in part due to the lack of information and support provided for caregivers and family members.

## PAC characteristics

PACs were composed of empathetic and supportive individuals with a common goal of advocating for improvement in sepsis care and research (Table 4). Many participants highlighted the need to engage with more family members and caregivers, as “they’ve had different lived experiences” (P6 – sepsis survivor) that could enrich the work of the councils. Some respondents felt the council would benefit from a wider range of values and insights, as they felt certain voices were

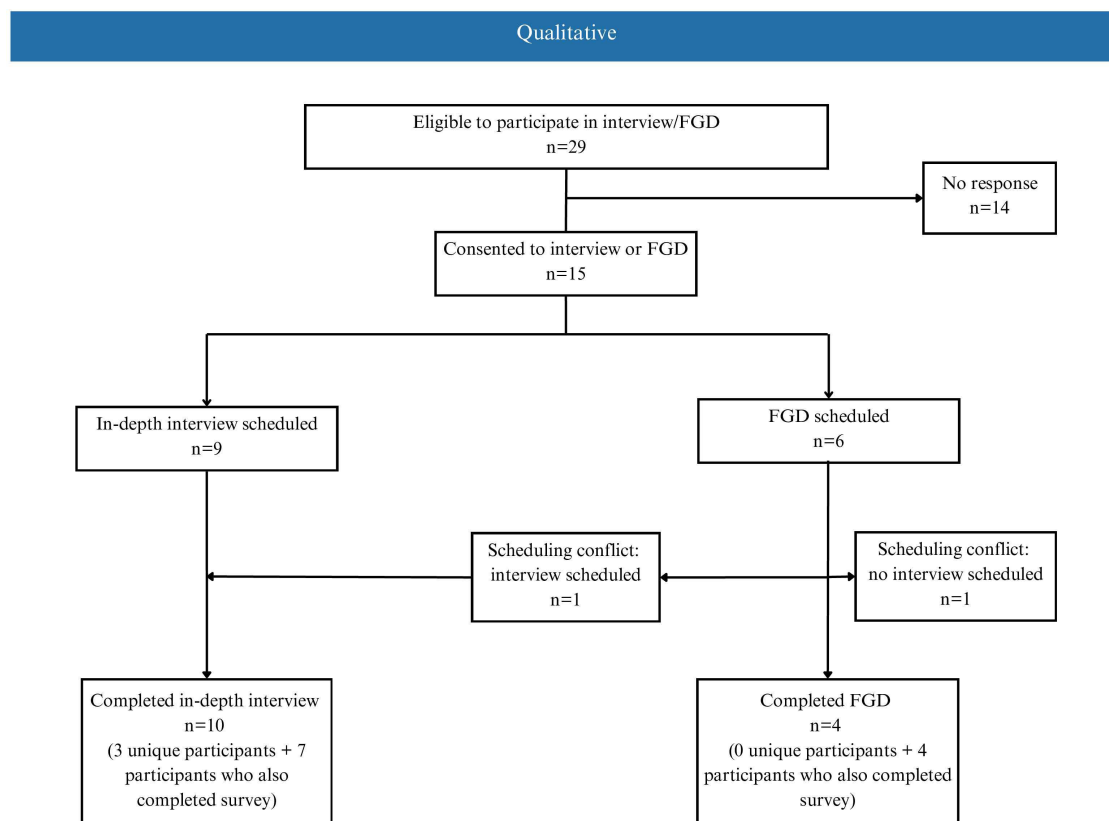

**Fig 2. Participant flow chart for qualitative methods.** A total of 14 PAC members participated in an interview or FGD. FGD = Focus group discussions.

<https://doi.org/10.1371/journal.pone.0334057.g002>

**Table 1. Level of meaningful patient engagement across the Patient Engagement in Research Scale (PEIRS) domains (n = 13).** In the validated PEIRS [21], a score below 70.1 is considered 'deficient' degree of meaningful engagement; between 70.1 and 82.7 is a 'moderate' degree; between 82.7 and 92.0 is a 'very high' degree; and above 92.0 is an 'extremely high' degree. The maximum score possible is 100.

| Participant | Score for each PEIRS domain |             |               |                                  |         |             |          | Overall PEIRS score |
|-------------|-----------------------------|-------------|---------------|----------------------------------|---------|-------------|----------|---------------------|
|             | Procedural requirements     | Convenience | Contributions | Team environment and interaction | Support | Feel valued | Benefits |                     |
| 1           | 100                         | 100         | 100           | 100                              | 100     | 100         | 100      | 100                 |
| 2           | 100                         | 100         | 100           | 100                              | 87.5    | 100         | 100      | 99.3                |
| 3           | 94.6                        | 87.5        | 100           | 35                               | 100     | 100         | 87.5     | 95.1                |
| 4           | 82.1                        | 81.25       | 100           | 100                              | 83.3    | 91.7        | 93.75    | 88.5                |
| 5           | 78.6                        | 93.75       | 87.5          | 95                               | 91.7    | 83.3        | 87.5     | 84.5                |
| 6           | N*                          | 75          | N*            | N*                               | N*      | N*          | N*       | 75                  |
| 7           | 76.8                        | 75          | 75            | 75                               | 75      | 75          | 75       | 75.7                |
| 8           | 75                          | 75          | 75            | 75                               | N*      | 75          | 75       | 75                  |
| 9           | 75                          | 75          | 75            | 75                               | 75      | 75          | 75       | 75                  |
| 10          | 78.6                        | 62.5        | 75            | 75                               | 66.7    | 75          | 81.3     | 75                  |
| 11          | 75                          | 75          | 75            | 75                               | 75      | 75          | 68.8     | 74.3                |
| 12          | 80.4                        | 81.25       | 100           | 100                              | 58.3    | 66.7        | 81.25    | 73.6                |
| 13          | N*                          | 0           | N*            | N*                               | N*      | N*          | N*       | 0                   |

\*N Indicates the participant did not respond to any items in this domain.

<https://doi.org/10.1371/journal.pone.0334057.t001>

**Table 2. Key findings and illustrative quote related to the sepsis experience.**

| Theme             | Key findings                                                                                                                                                                                                                                                                                                                                                      | Illustrative quote                                                                                                                                                                         |
|-------------------|-------------------------------------------------------------------------------------------------------------------------------------------------------------------------------------------------------------------------------------------------------------------------------------------------------------------------------------------------------------------|--------------------------------------------------------------------------------------------------------------------------------------------------------------------------------------------|
| Sepsis experience | <ul style="list-style-type: none"> <li>Diverse experiences with sepsis</li> <li>Highlighted importance of timely and accurate care</li> <li>Majority were in medically induced comas in the ICU, though one participant was unable to be admitted due to the shortage of available beds</li> <li>Many participants were never informed they had sepsis</li> </ul> | <i>"I felt like I wasn't really relayed the proper information that I should have had as a caretaker. And for me, I lost a bit of hope in... the healthcare system."</i> - P11 (caregiver) |

<https://doi.org/10.1371/journal.pone.0334057.t002>

**Table 3. Sub-themes, key findings, and illustrative quotes related to characteristics of recovery journey.**

| Sub-theme             | Key findings                                                                                                                                                                                                                                                                                                                                                                                                                                                                                                                                                                                                                                                                                   | Illustrative quote(s)                                                                                                                                                                                                                                                                                                                                                                                                                                 |
|-----------------------|------------------------------------------------------------------------------------------------------------------------------------------------------------------------------------------------------------------------------------------------------------------------------------------------------------------------------------------------------------------------------------------------------------------------------------------------------------------------------------------------------------------------------------------------------------------------------------------------------------------------------------------------------------------------------------------------|-------------------------------------------------------------------------------------------------------------------------------------------------------------------------------------------------------------------------------------------------------------------------------------------------------------------------------------------------------------------------------------------------------------------------------------------------------|
| Recovery expectations | <ul style="list-style-type: none"> <li>Had no expectations of the length of recovery and when everyday activities could be resumed, including returning to work</li> <li>Caregivers were unaware of long-term impacts of sepsis and how to better support their family member</li> </ul>                                                                                                                                                                                                                                                                                                                                                                                                       | <i>"I didn't know I was a sepsis survivor. Those words [were] actually never used with me in the hospital. So, when I was discharged, I had no expectations. I didn't know what had been wrong with me."</i> - P4 (sepsis survivor)                                                                                                                                                                                                                   |
| Physical recovery     | <ul style="list-style-type: none"> <li>Common physical symptoms among survivors following discharge: low energy, difficulty walking and completing other everyday activities, weight loss, and insomnia</li> <li>Other long-term physical impacts of sepsis and its complications: chronic pain, nerve damage, amputations, and bowel resections</li> </ul>                                                                                                                                                                                                                                                                                                                                    | <i>"[Sepsis] drastically impacted [my physical health] and I'm permanently disabled."</i> - P5 (sepsis survivor)<br><i>"Because I... was on a ventilator, I couldn't speak. I had to relearn how to speak and breathe [on my own]."</i> - P8 (sepsis survivor)                                                                                                                                                                                        |
| Mental recovery       | <ul style="list-style-type: none"> <li>Processing trauma was particularly difficult due to delayed awareness caused by being in a medically induced coma, resulting in survivors having to cope with events that had already occurred</li> <li>Faced uncertainties of how long their recovery would take or whether they could ever fully return to their pre-sepsis lives</li> <li>COVID-19 pandemic was a trigger for many sepsis survivors and brought traumatic memories, due to media coverage of ICU shortages and the fear of contracting COVID-19, which can lead to sepsis</li> <li>Mental health challenges were translated into motivation for becoming involved in PACs</li> </ul> | <i>The fact that no [healthcare provider] was kind of looking out for me despite me raising concerns, and my husband raising concerns... truly made me realize that... patients are out there on their own."</i> - P10 (sepsis survivor)<br><i>"I was very emotional, I was angry, I was sad... I was really lonely... No one knew what I'd been through... So it was a tough time."</i> - P4 (sepsis survivor)                                       |
| Cognitive recovery    | <ul style="list-style-type: none"> <li>Cognitive difficulties included: forgetfulness, memory loss, and false memories of being in the ICU</li> <li>Challenges highlighted need for better reminders about meetings and roles with the council</li> </ul>                                                                                                                                                                                                                                                                                                                                                                                                                                      | <i>"Part of my sepsis journey has been... having a lot of memory issues... a lot of focus issues, [and] executive functioning issues."</i> - P5 (sepsis survivor)                                                                                                                                                                                                                                                                                     |
| Economic recovery     | <ul style="list-style-type: none"> <li>Difficulties meeting the physical and cognitive demands of their job after returning to work following their sepsis experience</li> <li>Many participants were only able to return to work part-time, while some were able to resume full-time work</li> <li>A few participants were on long-term disability due to the lasting effects of sepsis</li> </ul>                                                                                                                                                                                                                                                                                            | <i>"I tried to go back to work at the same place. Just because of my... strength and determination, no one was going to tell me I [couldn't] go back to work. So, I went back twice, but it ended up being too difficult. The obstacles in terms of... the number of hours that I had to work and the physical demand of the job... It's not a physically demanding job in itself, but everything for me is... work now."</i> - P12 (sepsis survivor) |
| Others' recovery      | <ul style="list-style-type: none"> <li>Survivors recognized the impacts that sepsis had on their family members and difficulties they faced in their recovery</li> </ul>                                                                                                                                                                                                                                                                                                                                                                                                                                                                                                                       | <i>"The whole sepsis recovery takes a lot out of you as a patient, but even more so as a family member."</i> - P14 (sepsis survivor)                                                                                                                                                                                                                                                                                                                  |

<https://doi.org/10.1371/journal.pone.0334057.t003>

dominating the decision-making processes. Most participants valued the recognition and compensation that they received through their PAC involvement.

Responses from the participants agreed that PAC meeting times and outlines, study opportunities, and commitments were well communicated. PAC members were often consulted regarding availability, and all meetings were conducted virtually. However, those who were able to join PAC meetings during work hours emphasized the challenge of making a 'mental switch' (P8 – sepsis survivor), switching quickly between their roles as a sepsis survivor and their professional



**Table 4. Sub-themes, key findings, and illustrative quotes related to PAC characteristics.**

| Sub-theme                        | Key findings                                                                                                                                                                                                                                                                                                                                                                                                                                                                                                                                        | Illustrative quote(s)                                                                                                                                                                                                                                                                                                                                                                                                                                                                                                                                                                        |
|----------------------------------|-----------------------------------------------------------------------------------------------------------------------------------------------------------------------------------------------------------------------------------------------------------------------------------------------------------------------------------------------------------------------------------------------------------------------------------------------------------------------------------------------------------------------------------------------------|----------------------------------------------------------------------------------------------------------------------------------------------------------------------------------------------------------------------------------------------------------------------------------------------------------------------------------------------------------------------------------------------------------------------------------------------------------------------------------------------------------------------------------------------------------------------------------------------|
| Council composition              | <ul style="list-style-type: none"> <li>Majority of PAC members were sepsis survivors</li> <li>Participants understood importance of having more diversity in PACs</li> <li>Highlighted the lack of male representation in PACs</li> </ul>                                                                                                                                                                                                                                                                                                           | <i>"I meet a lot more patient partners that have actually had sepsis themselves... Whereas... I haven't met very many people that... are similar to me, where they were actually caregivers"</i> - P11 (caregiver)                                                                                                                                                                                                                                                                                                                                                                           |
| Recognition and compensation     | <ul style="list-style-type: none"> <li>Recognition included being acknowledged as patient partners in grant applications, manuscripts, other knowledge translation materials, and receiving invitations to speak at conferences</li> <li>Financial compensation was not necessary but was viewed as a meaningful gesture of appreciation</li> <li>Participants required a primary source of income beyond their role within the PAC, which reduced the time they had available to contribute to the councils</li> </ul>                             | Respondents discussed verbal and written appreciation they received, and feeling like their contributions were valued, particularly when they could <i>"see... the results of [their] contributions in a tangible way"</i> . - P14 (sepsis survivor)                                                                                                                                                                                                                                                                                                                                         |
| Meeting accommodation and format | <ul style="list-style-type: none"> <li>It was acceptable for participants to miss meetings if a work or personnel conflict arose, and meetings notes were made accessible afterwards</li> <li>Meetings consisted of opportunities for members to participate and have discussion</li> </ul>                                                                                                                                                                                                                                                         | <i>"I love that it's online... I love that we can have people from... [the] east coast to the west coast participate... within their own time zones. We do try to have a lot of... accessibility features, so people can connect online, they don't have to have their camera on, they don't have to talk... they can just be... quiet, passive individuals... We do ask for people's contributions and people are able... to talk during our sessions. They can... send an email afterwards... There [are] other ways to... submit their... thoughts and ideas."</i> - P5 (sepsis survivor) |
| Communication                    | <ul style="list-style-type: none"> <li>Clear understanding among participants that the councils welcomed feedback and questions during meetings</li> <li>Participants felt engaged, informed, and up to date on study opportunities and outcomes of council activities</li> </ul>                                                                                                                                                                                                                                                                   | <i>"I think there's really good communication with the council, but to an amount where it's not overwhelming."</i> - P15 (sepsis survivor)                                                                                                                                                                                                                                                                                                                                                                                                                                                   |
| Activities                       | <ul style="list-style-type: none"> <li>Activities included participating in meetings and research projects, conducting presentations, reviewing grant applications, and informing the development of a National Sepsis Action Plan</li> <li>Many of the projects were tailored towards the interests, skill sets, and experiences of the participants</li> <li>Members' roles included patient partner, steering committee member, and co-chair of PAC</li> <li>Participants described the time commitment as appropriate and manageable</li> </ul> | Many participants were also engaged in related committees and councils, as their involvement in sepsis PACs <i>"opened up some doors to... speak to other people and get involved in other groups."</i> - P11 (caregiver)                                                                                                                                                                                                                                                                                                                                                                    |

<https://doi.org/10.1371/journal.pone.0334057.t004>

roles beyond the PAC. Further, some respondents noted the lack of clarity regarding roles and responsibilities in the council, and the need for more frequent reminders of the committee's purpose and structure. Participants often struggled to characterize the specific activities that they contributed to, and did not always distinguish between activities led by the PACs, research networks, or individual research teams.

### Characteristics of PAC participation

Respondents initially had no expectations regarding their participation in PACs, largely due to the lack of specificity in communications describing how members could contribute to the PACs and the impacts of this involvement (Table 5). Many participants were surprised, stating they *"didn't expect for [their] voice to be so valued"* (P2 – sepsis survivor). A common reason for joining PACs was to better understand what had happened to them or their family members during their experience with sepsis. Using this knowledge, participants wanted to advocate for sepsis awareness among the public and healthcare workers to ensure earlier diagnoses for future sepsis patients and improve communication about post-discharge support to enhance the recovery of current and future sepsis survivors. Another key motivator for joining PACs was to connect with other sepsis survivors and caregivers.

**Table 5. Sub-themes, key findings, and illustrative quotes related to characteristics of PAC participation.**

| Sub-theme                     | Key findings                                                                                                                                                                                                                                                                                                                                                                                                                                                                 | Illustrative quote                                                                                                                                                                                                                                                                                                                                                                                                               |
|-------------------------------|------------------------------------------------------------------------------------------------------------------------------------------------------------------------------------------------------------------------------------------------------------------------------------------------------------------------------------------------------------------------------------------------------------------------------------------------------------------------------|----------------------------------------------------------------------------------------------------------------------------------------------------------------------------------------------------------------------------------------------------------------------------------------------------------------------------------------------------------------------------------------------------------------------------------|
| Expectations of participation | <ul style="list-style-type: none"> <li>Most participants were initially unaware of the research projects they could engage in as a member of a PAC</li> <li>Expectations often evolved over time, as PAC members better understood council operations, composition, and goals</li> </ul>                                                                                                                                                                                     | <p><i>"When I did officially get involved [in the PAC], I just thought it was... meet[ing] with scientists and researchers and doctors and kind of hav[ing]... an open discussion of what our experience has been like and... hav[ing] discussions about how we were going to advocate. And it has been that. But I feel like it's been that, and so much more."</i> - P11 (caregiver)</p>                                       |
| Motivation                    | <ul style="list-style-type: none"> <li>Members were recruited to join the councils through prior involvement in online sepsis survivor groups, connections with researchers of sepsis networks, or after sharing their sepsis story online</li> <li>Participants recognized the gaps in sepsis care and the need to amplify patient voices, which led them to join the councils</li> </ul>                                                                                   | <p><i>"I remember telling my parents and my sister about [joining the council]. And just saying, you know... I want there to be something good that comes out of mom's experience... And I [felt] like [joining the council] could possibly be... a path towards that."</i> - P7 (caregiver)</p>                                                                                                                                 |
| Timing                        | <ul style="list-style-type: none"> <li>Participants described how the time since their sepsis experience affected the impact of PAC involvement on their recovery</li> </ul>                                                                                                                                                                                                                                                                                                 | <p><i>"That was about 15 years ago that I experienced... sepsis, and... I've only recently got involved. I don't think it would've necessarily... impacted my recovery. But it has been nice just to kind of get to know that... a lot of my experiences were shared... It just sort of makes you feel like you're not totally alone."</i> - P10 (sepsis survivor)</p>                                                           |
| Emotional readiness           | <ul style="list-style-type: none"> <li>Highlighted the need for members to have emotional readiness to participate in PACs, as meetings and activities can trigger painful memories</li> <li>Members understood that emotional readiness may also be a barrier to recruiting new PAC members following their sepsis experience</li> <li>Need for strong social support from friends, family, psychologists, and their workplace to be able to participate in PACs</li> </ul> | <p><i>"My PTSD was really bad for a quite a long time. And so, it would be super triggering to go and attend [meetings] and listen to other people's stories... I became quite... cognizant that... it could be in that negative for me... hearing those stories all the time. And so... I had to be... good enough with myself and with my... situation before I was able to really be present."</i> - P5 (sepsis survivor)</p> |

<https://doi.org/10.1371/journal.pone.0334057.t005>

Participants joined PACs at various stages of their sepsis recovery, ranging from a few months to over 10 years after their initial sepsis experience. Those who joined years after their sepsis experience reported less direct impact of PAC involvement on their sepsis recovery. However, these participants recognized other positive effects, such as the normalization of their experiences and a strengthened sense of community. Participants emphasized the importance of understanding one's mental and physical capacities and ensuring that involvement has a *"net benefit"* (P5 – sepsis survivor) on their recovery from sepsis.

## Impacts of PAC involvement

All participants mentioned that PAC involvement can impact community sepsis awareness, recognition, management, and recovery (Table 6). Participants highlighted some of the impacts that their PAC involvement has on the council itself, including benefits brought to the council from applying their professional skills and expertise to council activities and how they contributed to growing council membership by raising awareness of the impacts of PAC involvement. PAC members were able to better understand sepsis and research as a result of their involvement in the councils and were able to share the knowledge with family members which further *"helped them in their [mental and emotional] recovery"* (P11 – caregiver). Engaging in PACs allowed members to share their sepsis experience(s) with others, leading to feelings of fulfillment, strength, and connection with fellow survivors and their families.

## Discussion

We explored the impacts of engaging with PACs on long-term recovery of sepsis survivors and their families. In our study, participants' experiences with sepsis and recovery were validated through social interactions and improved knowledge of sepsis, creating positive impacts beyond feeling valued for their contributions through recognition or compensation. These

**Table 6. Sub-themes, key findings, and illustrative quotes related to impacts of PAC involvement.**

| Sub-theme                   | Key findings                                                                                                                                                                                                                                                                                                                                                                                                                                                                                | Illustrative quote                                                                                                                                                                                                                                                                                                                                                                |
|-----------------------------|---------------------------------------------------------------------------------------------------------------------------------------------------------------------------------------------------------------------------------------------------------------------------------------------------------------------------------------------------------------------------------------------------------------------------------------------------------------------------------------------|-----------------------------------------------------------------------------------------------------------------------------------------------------------------------------------------------------------------------------------------------------------------------------------------------------------------------------------------------------------------------------------|
| Impact on community         | <ul style="list-style-type: none"> <li>Connected with other sepsis survivors through online groups or posts on an individual level and provided one-on-one support with their recovery</li> <li>Directly witnessed the impacts of their involvement on their community (e.g., raising awareness of sepsis and the importance of early recognition and diagnosis among their colleagues working in healthcare)</li> </ul>                                                                    | <i>"After being on [the council] for the last few years, I really discovered how much of an impact it makes having... patient partners being apart [of councils] and really advocating. Because they're the ones that have actually experienced it. And it can actually speak towards... the general public but also... researchers or healthcare workers." - P11 (caregiver)</i> |
| Impact on council           | <ul style="list-style-type: none"> <li>Noted the importance of further recruitment to improve and strengthen the council</li> <li>The impact of their PAC involvement on other council members depended on whether participants felt they brought unique perspectives or skills, their connections to other members, and whether they were comfortable sharing their stories regularly</li> </ul>                                                                                           | <i>"There's got to be some others that come in and can offer some other perspectives, so that we're not hearing the same perspective all the time... And that might... breed some further ideas into where we need to be." - P9 (sepsis survivor)</i>                                                                                                                             |
| Impact on immediate network | <ul style="list-style-type: none"> <li>PAC involvement had indirect positive impacts on family members of sepsis survivors</li> <li>However, some sepsis survivors mentioned that their family did not want to be involved in PACs as part of their recovery journey</li> </ul>                                                                                                                                                                                                             | <i>"If [my family] see that I'm doing very well and happy and it helped me process... my own experience, they would benefit from that as well." - P1 (sepsis survivor)</i>                                                                                                                                                                                                        |
| Impact on oneself           | <ul style="list-style-type: none"> <li>Participants' repeated exposure to discussions about sepsis and survivor experiences, along with sharing their stories, contributed to their mental healing</li> <li>Engagement in sepsis research and advocacy strengthened their knowledge of sepsis and understanding of their own experiences, aiding them in their recovery journey</li> <li>PAC opportunities also led to new connections with researchers and healthcare providers</li> </ul> | <i>"Everyone's situation is very unique... But at the end of the day, we know what the impact of sepsis and the toll it has. So, I think there still is that unity despite having very different experiences and stories to tell." - P11 (caregiver)</i>                                                                                                                          |

<https://doi.org/10.1371/journal.pone.0334057.t006>

findings add to prior research demonstrating the benefits of patient-oriented research in health research networks [26,27]. We also found that members had limited expectations about their role and the impact of engaging in PACs and highlighted the ongoing challenge of establishing PACs that are truly representative of all patient populations.

Our study demonstrated that PAC involvement supports recovery, particularly the mental well-being of sepsis survivors and their families. Patient partners reported being able to build professional and personal communities and connections with other individuals with lived experience and build knowledge and skills surrounding sepsis. These positive impacts on patient well-being align with a recent study that found patient partners involved in a health research network for chronic pain used their involvement to build a social network that supported recovery and learning. This helped partners cope with their own pain experiences [26]. In our study, patient partners also noted how sharing stories and experiences positively impacted their mental healing and recovery, similar to the experiences reported by ICU survivors participating in peer support groups [28].

We found that participants often had no expectations about their involvement in PACs when first joining the council. As research progressed, patient partners better understood the ways of participating in research, specific project goals, and team member needs, leading to clearer expectations for engagement. Similar experiences were reported by members of a kidney health research network PAC [27]. Within the context of health research networks, PAC members may support several research studies and knowledge translation activities with different aims, levels of engagement, and intended impacts [16]. This breadth of activities necessitates clearer communication about the roles and responsibilities of patient partners, research staff, and investigators, and the differences between individual-, network-, and council-led activities.

A unique aspect of our study is that the positive impacts of PAC involvement occurred in a context largely outside the formal healthcare system. For instance, the ICU peer support study conducted in the UK was facilitated by a critical care psychologist and supported by a critical care rehabilitation nurse [28], while Action on Sepsis and Sepsis Canada PACs

are facilitated by cluster coordinators and PAC co-chairs, with no formal integration with acute care. Further, the online support groups that connect many survivors and caregivers to PACs are moderated by the sepsis survivor community. Our findings highlight the potential benefits of developing formalized sepsis support structures. Moreover, patients as well as clinicians may benefit if these structures are linked to organizations leading research or knowledge translation activities to give input and inform changes in sepsis awareness and care.

### Future recommendations

The in-hospital sepsis experiences and post-discharge challenges described in our study re-enforce the need for enhanced patient-healthcare provider communication on the long-lasting impacts of sepsis and improved post-sepsis care pathways in Canada, and globally. There have been efforts to improve the hospital to home transition for sepsis patients [29], but these practices have not been widely implemented. Our study highlights the important role that patients and families should have as research partners involved in developing and evaluating post-sepsis care pathways and as individuals who support their peers in recovery as part of these pathways. Improved communication about roles and the benefits of engagement may enable recruitment of more diverse voices of sepsis survivors and their families as research partners. Addressing this gap in current research is critical, particularly in sepsis research, as equity-deserving communities face a disproportionately high burden of sepsis [3,30,31]. Educational materials on post-sepsis syndrome provided to sepsis survivors at discharge may be a venue for communicating benefits and recruiting additional partners; however, careful consideration of the timing of recruitment relative to a patient's journey and processes for supporting safe and respectful engagement is needed.

### Limitations

Due to our sampling population, which only included current PAC members, our results are biased towards positive experiences with PACs and recovery from sepsis. Further, our results may not be generalizable given the small sample size and the limited sociodemographic diversity within our study population. The small sample size also made it difficult to assess the impacts of specific PAC activities or characteristics on recovery. Participants also experienced difficulty distinguishing between specific activities, further contributing to this limitation and highlighting the need for clearer communication by the research networks. Despite these limitations, the findings are strengthened by the study team's extensive experience in sepsis research and their lived experiences with sepsis, bringing a unique and comprehensive perspective to the study.

### Conclusion

Our study demonstrates that PACs provide benefits that go beyond participants' sense of contributing to a specific project and support recovery. Insights from this study highlight how involvement in patient-oriented research can directly benefit sepsis survivors and their families and reinforce the value of patient-centered sepsis care. While the benefits of patient-oriented research is well-documented in health research, this study extends and enhances this evidence by demonstrating how benefits of this engagement can extend beyond the positive impacts directly on participants to impacts on the public and broader healthcare community. Through such engagement, Canada has an opportunity to develop inclusive and comprehensive sepsis care frameworks that better meet the needs of survivors and their families and reduce the long-term impacts of sepsis. A national sepsis strategy, as called for by the World Health Assembly 70.7 resolution on sepsis [32], would facilitate coordinated implementation of such frameworks [33]. Notably, this study is among the first to explore how engagement with research networks supports recovery for sepsis survivors, offering a model for similar initiatives and highlighting the potential for research networks to drive meaningful improvements in patient recovery and care.

## Supporting information

### **S1 Appendix. Consensus-based checklist for reporting for survey studies (CROSS).**

(DOCX)

### **S2 Appendix. Consolidated criteria for reporting qualitative studies (COREQ): 32-item checklist.**

(DOCX)

### **S3 Appendix. Guidance for reporting involvement of patients and the public (GRIPP2) short form.**

(DOCX)

### **S4 Appendix. Survey questions.**

(DOCX)

### **S5 Appendix. Interview guide.**

(DOCX)

## Acknowledgments

We would like to thank the participants of this study for their willingness to share their experiences and acknowledge the patient partners of this study team for their insights and commitment to sepsis advocacy.

## Author contributions

**Conceptualization:** Stefanie K Novakowski, Fatima Sheikh, Susan Korstad, Kristin MacDonald, Kristine Russell, Marie-Maxime Bergeron, Marianne Vidler.

**Formal analysis:** Mia Sheehan, Stefanie K Novakowski, Fatima Sheikh, Jordan Sacks, Marie-Maxime Bergeron, Marianne Vidler.

**Funding acquisition:** Stefanie K Novakowski, Kristine Russell, Marie-Maxime Bergeron, Marianne Vidler.

**Investigation:** Mia Sheehan, Stefanie K Novakowski.

**Project administration:** Stefanie K Novakowski.

**Writing – original draft:** Mia Sheehan, Stefanie K Novakowski, Fatima Sheikh, Marianne Vidler.

**Writing – review & editing:** Mia Sheehan, Stefanie K Novakowski, Fatima Sheikh, Susan Korstad, Kristin MacDonald, Jordan Sacks, Kristine Russell, Marie-Maxime Bergeron, Marianne Vidler.

## References

1. Singer M, Deutschman CS, Seymour CW, Shankar-Hari M, Annane D, Bauer M, et al. The third international consensus definitions for sepsis and septic shock (Sepsis-3). *JAMA*. 2016;315(8):801–10. <https://doi.org/10.1001/jama.2016.0287> PMID: [26903338](#)
2. Angus DC, van der Poll T. Severe sepsis and septic shock. *N Engl J Med*. 2013;369(9):840–51. <https://doi.org/10.1056/NEJMr1208623> PMID: [23984731](#)
3. Rudd KE, Johnson SC, Agesa KM, Shackelford KA, Tsoi D, Kievian DR, et al. Global, regional, and national sepsis incidence and mortality, 1990–2017: analysis for the global burden of disease study. *Lancet*. 2020;395(10219):200–11. [https://doi.org/10.1016/S0140-6736\(19\)32989-7](https://doi.org/10.1016/S0140-6736(19)32989-7) PMID: [31954465](#)
4. Farrah K, McIntyre L, Doig CJ, Talarico R, Taljaard M, Krahn M, et al. Sepsis-associated mortality, resource use, and healthcare costs: a propensity-matched cohort study. *Crit Care Med*. 2021;49(2):215–27. <https://doi.org/10.1097/CCM.0000000000004777> PMID: [33372748](#)
5. Rousseau AF, Prescott HC, Brett SJ, Weiss B, Azoulay E, Creteur J, et al. Long-term outcomes after critical illness: recent insights. *Crit Care*. 2021;25(1):108. <https://doi.org/10.1186/s13054-021-03535-3> PMID: [33731201](#)
6. Goodwin AJ, Ford DW. Readmissions among sepsis survivors: risk factors and prevention. *Clin Pulm Med*. 2018;25(3):79–83. <https://doi.org/10.1097/CPM.0000000000000254> PMID: [30237689](#)
7. Barrett KA, Sheikh F, Chechulina V, Chung H, Dodek P, Rosella L, et al. High-cost users after sepsis: a population-based observational cohort study. *Crit Care*. 2024;28(1):338. <https://doi.org/10.1186/s13054-024-05108-6> PMID: [39434142](#)



8. Dick A, Liu H, Zwanziger J, Perencevich E, Furuya EY, Larson E, et al. Long-term survival and healthcare utilization outcomes attributable to sepsis and pneumonia. *BMC Health Serv Res*. 2012;12:432. <https://doi.org/10.1186/1472-6963-12-432> PMID: [23181764](#)
9. Linder A, Guh D, Boyd JH, Walley KR, Anis AH, Russell JA. Long-term (10-year) mortality of younger previously healthy patients with severe sepsis/septic shock is worse than that of patients with nonseptic critical illness and of the general population. *Crit Care Med*. 2014;42(10):2211–8. <https://doi.org/10.1097/CCM.0000000000000503> PMID: [25054672](#)
10. Anderson WG, Arnold RM, Angus DC, Bryce CL. Posttraumatic stress and complicated grief in family members of patients in the intensive care unit. *J Gen Intern Med*. 2008;23(11):1871–6. <https://doi.org/10.1007/s11606-008-0770-2> PMID: [18780129](#)
11. Chudyk AM, Stoddard R, McCleary N, Duhamel TA, Shimmin C, Hickes S. Activities and impacts of patient engagement in CIHR SPOR funded research: a cross-sectional survey of academic researcher and patient partner experiences. *Res Involv Engagem*. 2022;8(1):1–44. <https://doi.org/10.1186/s40900-022-00376-4> PMID: [36038887](#)
12. McCabe E, Amarbayan MM, Rabi S, Mendoza J, Naqvi SF, Thapa Bajgain K, et al. Youth engagement in mental health research: a systematic review. *Health Expect*. 2023;26(1):30–50. <https://doi.org/10.1111/hex.13650> PMID: [36385452](#)
13. Lewis KB, Peter N, Graham ID, Kothari A. Engaging people with lived experience on advisory councils of a national not-for-profit: an integrated knowledge translation case study of heart and stroke mission critical area councils. *Health Res Policy Syst*. 2022;20(1):56. <https://doi.org/10.1186/s12961-022-00863-w> PMID: [35606768](#)
14. Paolucci A, Nielssen I, Tang KL, Sinnarajah A, Simon JE, Santana MJ. The impacts of partnering with cancer patients in palliative care research: a systematic review and meta-synthesis. *Palliat Care and Soc Pract*. 2022;16. <https://doi.org/10.1177/26323524221131581> PMID: [36274787](#)
15. Dhamanaskar R, Boothe K, Massie J, You J, Just D, Kuang G, et al. Trends in government-initiated public engagement in Canadian health policy from 2000 to 2021. *Healthc Policy*. 2024;20(SP):17–35. <https://doi.org/10.12927/hcpol.2024.27416> PMID: [39417268](#)
16. Nielssen I, Santana M, Pokharel S, Strain K, Kiryanova V, Zelinsky S. Operationalizing the principles of patient engagement through a patient advisory council: lessons and recommendations. *Health Expect*. 2023;27(1):e13909. <https://doi.org/10.1111/hex.13909> PMID: [37942678](#)
17. Warren M, Leamon T, Hall A, Twells L, Street C, Stordy A, et al. The role of patient advisory councils in health research: lessons from two provincial councils in Canada. *J Patient Exp*. 2020;7(6):898–905. <https://doi.org/10.1177/2374373520909598> PMID: [33457517](#)
18. Esmail L, Moore E, Rein A. Evaluating patient and stakeholder engagement in research: moving from theory to practice. *J Comp Eff Res*. 2015;4(2). <https://doi.org/10.2217/cer.14.79> PMID: [25825842](#)
19. Sharma A, Minh Duc NT, Luu Lam Thang T, Nam NH, Ng SJ, Abbas KS, et al. A Consensus-based checklist for reporting of survey studies (CROSS). *J Gen Intern Med*. 2021;36(10):3179–87. <https://doi.org/10.1007/s11606-021-06737-1> PMID: [33886027](#)
20. Tong A, Sainsbury P, Craig J. Consolidated criteria for reporting qualitative research (COREQ): a 32-item checklist for interviews and focus groups. *Int J Qual Health Care*. 2007;19(6):349–57. <https://doi.org/10.1093/intqhc/mzm042> PMID: [17872937](#)
21. Hamilton CB, Hoens AM, Backman CL, McKinnon AM, McQuitty S, English K, et al. An empirically based conceptual framework for fostering meaningful patient engagement in research. *Health Expect*. 2018;21(1):396–406. <https://doi.org/10.1111/hex.12635> PMID: [28984405](#)
22. Braun V, Clarke V. Using thematic analysis in psychology. *Qual Res Psychol*. 2006;3(2):77–101.
23. van Manen M, Higgins I, van der Riet P. A conversation with Max van Manen on phenomenology in its original sense. *Nurs Health Sci*. 2016;18(1):4–7. <https://doi.org/10.1111/nhs.12274> PMID: [26931367](#)
24. van Manen M. *Phenomenology of practice: meaning-giving methods in phenomenological research and writing*. Walnut Creek, California: Left Coast Press; 2014. <https://doi.org/10.4324/9781003228073>
25. Thomas DR. A general inductive approach for analyzing qualitative evaluation data. *Am J Eval*. 2006;27(2):237–46. <https://doi.org/10.1177/1098214005283748>
26. Tripp L, Richards DP, Daly-Cyr J, Lane T, Linkiewicz D, Begley KN, et al. Evaluating the impacts of patient engagement on a national health research network: results of a case study of the chronic pain network. *Res Involv Engagem*. 2023;9(1):73. <https://doi.org/10.1186/s40900-023-00491-w> PMID: [37649098](#)
27. Elliott MJ, McCarron TL, Schick-Makaroff K, Getchell L, Manns B, Fernandez N. The dynamic nature of patient engagement within a Canadian patient-oriented kidney health research network: perspectives of researchers and patient partners. *Health Expect*. 2023;26(2):905–18. <https://doi.org/10.1111/hex.13716> PMID: [36704935](#)
28. Clarke R, Chow H, Kerrison K. An Intensive Care Unit peer support group: participants' views on format, content and the impact on recovery journeys. *J Intensive Care Soc*. 2023;24(3):258–64. <https://doi.org/10.1177/17511437221108905> PMID: [37744077](#)
29. Eaton TA, Kowalkowski M, Burns R, Tapp H, O'Hare K, Taylor SP. Pre-implementation planning for a sepsis intervention in a large learning health system: a qualitative study. *BMC Health Serv Res*. 2024;24(1):996. <https://doi.org/10.1186/s12913-024-11344-x> PMID: [39192331](#)
30. Sheikh F, Douglas W, Catenacci V, Machon C, Fox-Robichaud AE. Social determinants of health associated with the development of sepsis in adults: a scoping review. *Crit Care Explor*. 2022;4(7):e0731. <https://doi.org/10.1097/CCE.0000000000000731> PMID: [36818749](#)
31. Sheikh F, Douglas W, Diao YD, Correia RH, Gregoris R, Machon C, et al. Social determinants of health and sepsis: a case-control study. *Can J Anaesth*. 2024;71(10):1397–405. <https://doi.org/10.1007/s12630-024-02790-6> PMID: [38955983](#)
32. Reinhart K, Daniels R, Kissoon N, Machado FR, Schachter RD, Finfer S. Recognizing sepsis as a global health priority - a WHO resolution. *N Engl J Med*. 2017;377(5):414–7. <https://doi.org/10.1056/NEJMp1707170> PMID: [28658587](#)
33. Sheikh F, Chechulina V, Garber G, Hendrick K, Kissoon N, Proulx L, et al. Reducing the burden of preventable deaths from sepsis in Canada: a need for a national sepsis action plan. *Healthc Manage Forum*. 2024;37(5):366–70. <https://doi.org/10.1177/08404704241240956> PMID: [38597370](#)
